# Supplementary material
Source: Springer Nature journal article supplement (https://www.springermedizin.de/resource/supplementary/12933_2011_380_MOESM2_ESM.pdf/9538320)

**DNA Fragmentation**

**(% of 5.6 mM Glucose)**

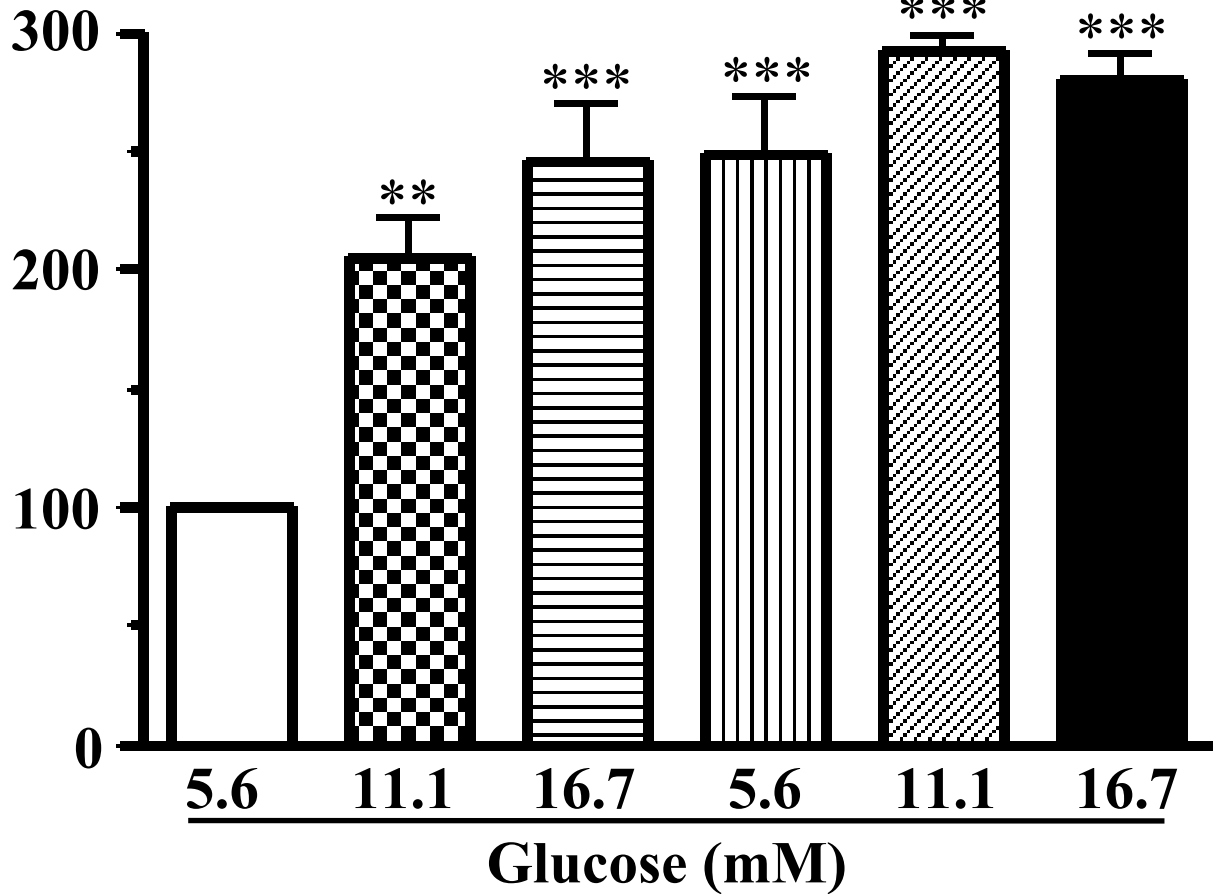

**TNF- $\alpha$  0.3 nM**

Supplement: MOESM2 [file 9538320]
